# Supplementary material
Source: publisher figshare collection journal article supplement (https://sage.figshare.com/ndownloader/files/14841041)
Supplement: Supplementary file 1 [file 14841041]

Appendix A. Adapted psychosocial measures with sedentary-specific questions and internal consistencies (Cronbach's  $\alpha$ ).

| Variable                 | Items | Questions*                                                                                                                                                                                                                                                                                                                                                                                                                                                                                                                                                                                                                                                                          | Baseline Alpha | Follow-up Alpha |
|--------------------------|-------|-------------------------------------------------------------------------------------------------------------------------------------------------------------------------------------------------------------------------------------------------------------------------------------------------------------------------------------------------------------------------------------------------------------------------------------------------------------------------------------------------------------------------------------------------------------------------------------------------------------------------------------------------------------------------------------|----------------|-----------------|
| Perceived Benefits       | 6     | Please indicate the degree to which you agree or disagree with each or the statements: <ul style="list-style-type: none"> <li>Sitting less will improve my health</li> <li>Sitting less will improve my energy level</li> <li>Sitting less will improve my mood</li> <li>Sitting less will improve my sleep</li> <li>Sitting less would increase my muscle strength</li> <li>I would feel better if I sat less</li> </ul>                                                                                                                                                                                                                                                           | 0.92           | 0.86            |
| Perceived Barriers       | 4     | Please indicate the degree to which you agree or disagree with each or the statements: <ul style="list-style-type: none"> <li>Sitting less would be tiring</li> <li>My health would make it hard to sit less</li> <li>I lack motivation to sit less</li> <li>I lack energy to sit less</li> </ul>                                                                                                                                                                                                                                                                                                                                                                                   | 0.75           | 0.62            |
| Social support           | 1     | Friends and family would support me in sitting less                                                                                                                                                                                                                                                                                                                                                                                                                                                                                                                                                                                                                                 | NA             | NA              |
| Self-efficacy            | 9     | How sure are you that you can... <ul style="list-style-type: none"> <li>Take breaks from sitting every 20 minutes?</li> <li>Stand while watching part of a TV show?</li> <li>Reduce the amount of time you watch TV?</li> <li>Stand while using the computer periodically?</li> <li>Spend more time standing throughout the day?</li> <li>Stand for 20 minutes at a time without resting?</li> <li>Reduce the amount of time you spend sitting by 1 hour per day?</li> <li>Reduce the amount of time you spend sitting by 2 hours per day</li> <li>Reduce the amount of time you spend sitting while watching TV?</li> </ul>                                                        | 0.75           | 0.84            |
| Sedentary Habit strength | 10    | Please indicate the degree to which you agree or disagree with each or the statements: <ul style="list-style-type: none"> <li>Sitting is something that I do frequently</li> <li>Sitting is something that I do automatically</li> <li>It would require effort not to sit</li> <li>I would find it hard not to sit</li> <li>I enjoy watching TV</li> <li>I enjoy sitting</li> <li>I enjoy using my computer, tablet, or smartphone</li> <li>I experience exhaustion, weakness, or pain when I stand for long periods of time</li> <li>It is difficult for me to get up out of a chair</li> <li>I would feel awkward or embarrassed if I stood while others were standing</li> </ul> | 0.69           | 0.72            |

\*All response options ranged 1-5.
